# Supplementary material for: Development of an impedimetric aptasensor for Shiga-like toxin 1 using a DNA aptamer and an interdigitated microelectrode
Source: Royal Society of Chemistry journal article supplement (doi:10.1039/d5ra09084a), 2026-01-01
Supplement: d5ra09084a1.pdf [file d5ra09084a1.pdf]

## SUPPLEMENTARY INFORMATION

### Development of an impedimetric aptasensor for Shiga-like toxin 1 using a DNA aptamer and interdigitated microelectrode

Malaya Mili<sup>a</sup>, Somasekhar R. Chinnadayala<sup>b,1</sup>, Sungbo Cho<sup>b,c</sup>, and Pranab Goswami<sup>\*a</sup>

a. Department of Biosciences and Bioengineering, Indian Institute of Technology Guwahati, Guwahati 781039, Assam, India.

b. Department of Electronic Engineering, Department of Semiconductor Engineering, Gachon University, Seongnam-si, Gyeonggi-do, 13120, Republic of Korea.

c. Gachon Advanced Institute for Health Science & Technology, Gachon University, Incheon 21999, Republic of Korea.

Current address: Transdermal Diagnostics Ltd, Science Creates, Old Market, Midland road, Bristol, BS2 0NS, England, United Kingdom.

\*Address for correspondence: [pgoswami@iitg.ac.in](mailto:pgoswami@iitg.ac.in) (P. Goswami)

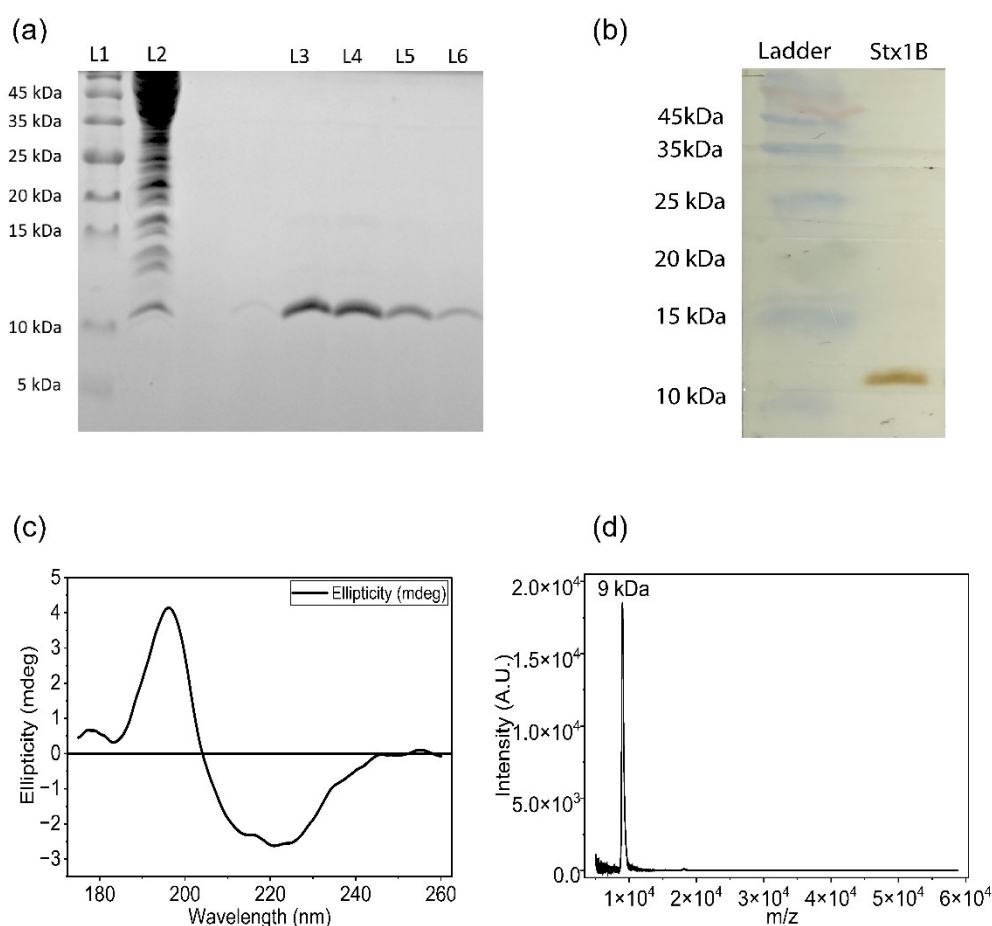

**Figure S1: (a) Tricine SDS-PAGE analysis of purified Stx1B, L1- Ladder, L2- crude cell lysate, L3-L6- Purified Stx1B, (b) Western blot analysis of Stx1B using anti-Stx1B antibody, (c) CD**

17 spectrum of Stx1B, and (d) MALDI-TOF analysis of Stx1B. All corresponding experiments for  
18 the characterization of Stx2B were also performed.

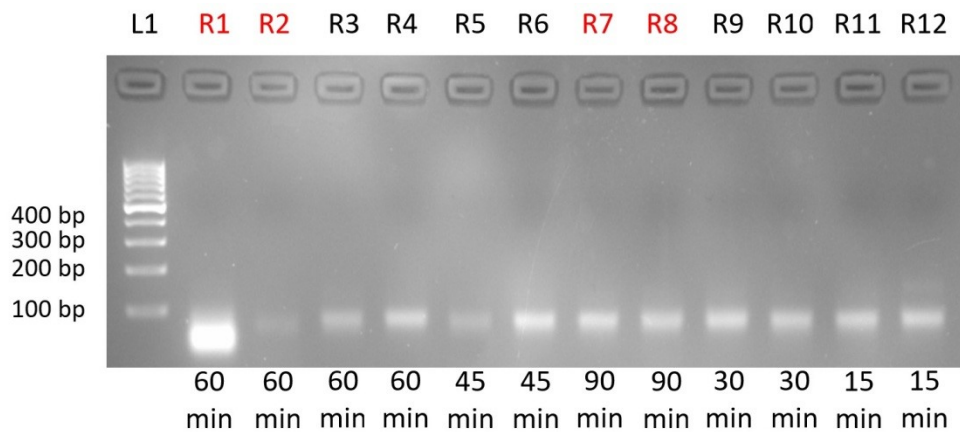

19  
20 **Figure S2: Amplified bands at the end of each SELEX round. The red rounds represent**  
21 **the negative SELEX. The incubation time for each round is indicated at the bottom of the**  
22 **gel.**

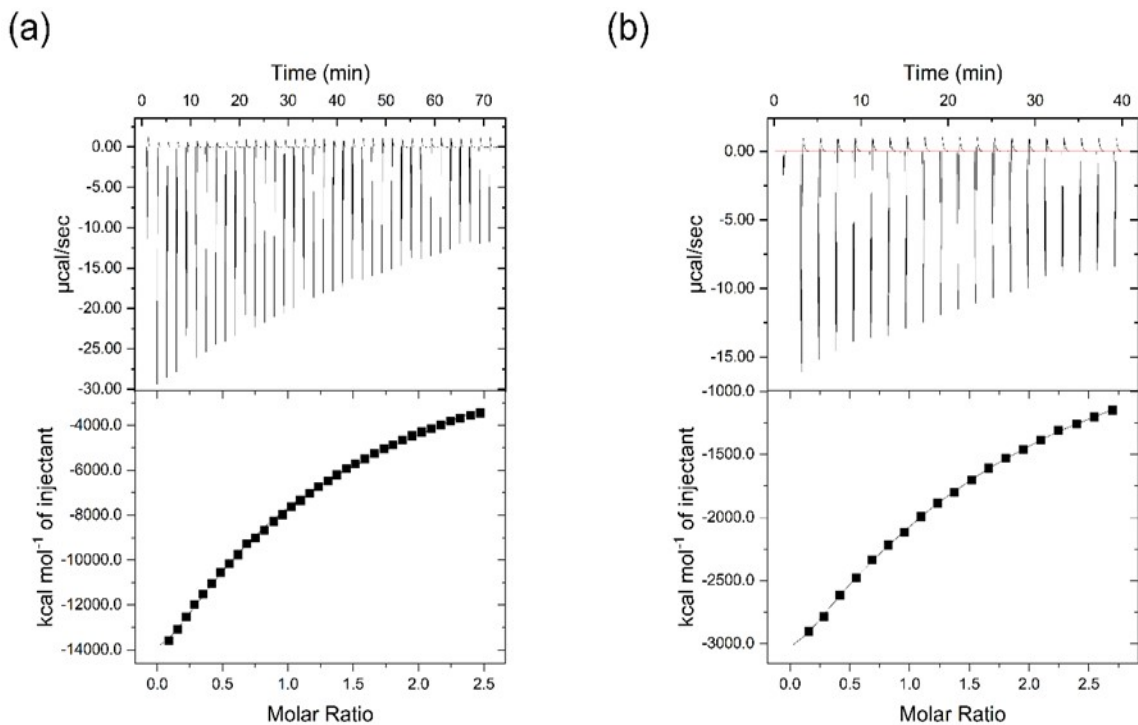

**Figure S3- ITC profile of the interaction between (a) Stx1-sT3 and (b) Stx1-sT12.**

| Cycle number | Molecule incubated with the library | Positive/Negative SELEX cycle | Incubation time (Minutes) |
|--------------|-------------------------------------|-------------------------------|---------------------------|
| R1           | Ni-NTA beads                        | Negative                      | 60                        |
| R2           | Stx2B                               | Negative                      | 60                        |
| R3           | Stx1B                               | Positive                      | 60                        |
| R4           | Stx1B                               | Positive                      | 60                        |
| R5           | Stx1B                               | Positive                      | 45                        |
| R6           | Stx1B                               | Positive                      | 45                        |
| R7           | Ni-NTA beads                        | Negative                      | 90                        |
| R8           | Stx2B                               | Negative                      | 90                        |
| R9           | Stx1B                               | Positive                      | 30                        |
| R10          | Stx1B                               | Positive                      | 30                        |
| R11          | Stx1B                               | Positive                      | 15                        |
| R12          | Stx1B                               | Positive                      | 15                        |

**Table S1: Selection parameters of SELEX process.**

| Sequence Name | Sequence (5'-3')                                                            |
|---------------|-----------------------------------------------------------------------------|
| sT3           | CACCTAATACGACTCACTATAGACTAAAGGGGCTTGATACCATAACTATG<br>TCCTGGCTCGAACAAGCTTGC |
| sT12          | CACCTAATACGACTCACTATAGTTGGCGCTGTATAGTCGAAGTAGTTACA<br>TCCTGGCTCGAACAAGCTTGC |

**Table S2: Selected aptamer sequences.**

| Spiked | Detected | Recovery % | RSD% |
|--------|----------|------------|------|
| 10 pM  | 10.35 pM | 103.5      | 0.97 |

|        |        |      |      |
|--------|--------|------|------|
| 200 pM | 197.6  | 98.8 | 1.66 |
| 400 pM | 390 pM | 97.5 | 1.98 |

**Table S3: Recovery of the target protein from spiked milk samples.**
